# Supplementary material for: Selecting External Controls for Internal Cases Using Stratification Score Matching Methods
Source: MDPI journal article supplement (doi:10.3390/ijerph19052549), 2022-02-23

**Table S1.** Table demonstrating covariates used in SS model and how variables were measured in individual studies and re-categorized for the current analysis.

| Variable              | CHARGE                                                                                                                                                                 | NHANES                                                                                                                                                                                                                                                                                 | Re-categorization                                                                      |
|-----------------------|------------------------------------------------------------------------------------------------------------------------------------------------------------------------|----------------------------------------------------------------------------------------------------------------------------------------------------------------------------------------------------------------------------------------------------------------------------------------|----------------------------------------------------------------------------------------|
| Maternal Education    | Mom's education<br>1. High school diploma/GED or less<br>2. Some college (incl. vocational. 2-yr degree)<br>3. Bachelor's degree<br>3. Graduate or professional degree | Female household ref's education<br>1. Less than 9 <sup>th</sup> grade<br>1. 9-11 <sup>th</sup> Grade (no diploma)<br>1. High school Grad/GED equivalent<br>2. Some college or AA degree<br>3. College graduate or above<br>Race/Ethnicity<br>3. Mexican American<br>3. Other Hispanic | 1. High school diploma/ GED or less<br>2. Some college<br>3. College graduate or above |
| Child's Race          | Child's Race<br>1. White (non-Hispanic)<br>2. Non-White (non-Hispanic)<br>3. Hispanic Race                                                                             | 1. Non-Hispanic White<br>2. Non-Hispanic Black<br>2. Other Race / Multi-Racial                                                                                                                                                                                                         | 1. White (non-Hispanic)<br>2. Non-White (non-Hispanic)/ Other<br>3. Hispanic Race      |
| Birth Place of Mother | Birth Place of Mother<br>1. USA<br>2. Mexico<br>3. Outside USA or Mexico                                                                                               | Female household ref's country of birth<br>1. USA<br>2. Mexico<br>3. Other Spanish speaking country<br>3. Other non-Spanish speaking country                                                                                                                                           | 1. USA<br>2. Mexico<br>3. Outside USA or Mexico                                        |
| Homeowner status      | Homeowner<br>1. Yes<br>2. No                                                                                                                                           | Homeowner<br>1. Owned or being bought<br>2. Rented<br>2. Other arrangement                                                                                                                                                                                                             | 1. Homeowner<br>2. Not a homeowner                                                     |
| Sex of child          | 1. Male<br>2. Female                                                                                                                                                   | 1. Male<br>2. Female                                                                                                                                                                                                                                                                   |                                                                                        |
| Maternal age          | Maternal age in years                                                                                                                                                  | Age of Female household – participant's age (in years)                                                                                                                                                                                                                                 |                                                                                        |
| Child's age           | Child's age in months                                                                                                                                                  | Participant's age in months                                                                                                                                                                                                                                                            |                                                                                        |
| Year of birth         | Year of birth as provided                                                                                                                                              | Estimated year of birth: 2 <sup>nd</sup> year of NHANES cycle – participant's age (in years)                                                                                                                                                                                           |                                                                                        |

Abbreviations: USA= United States of America; GED= General education diploma; AA=Associate of Arts; ref=Reference; CHARGE= Childhood Autism Risks from Genetics and the Environment; NHANES= the National Health and Nutrition Examination Survey

**Figure S1.** Flowchart of participant inclusion and exclusion criteria for CHARGE and NHANES samples.

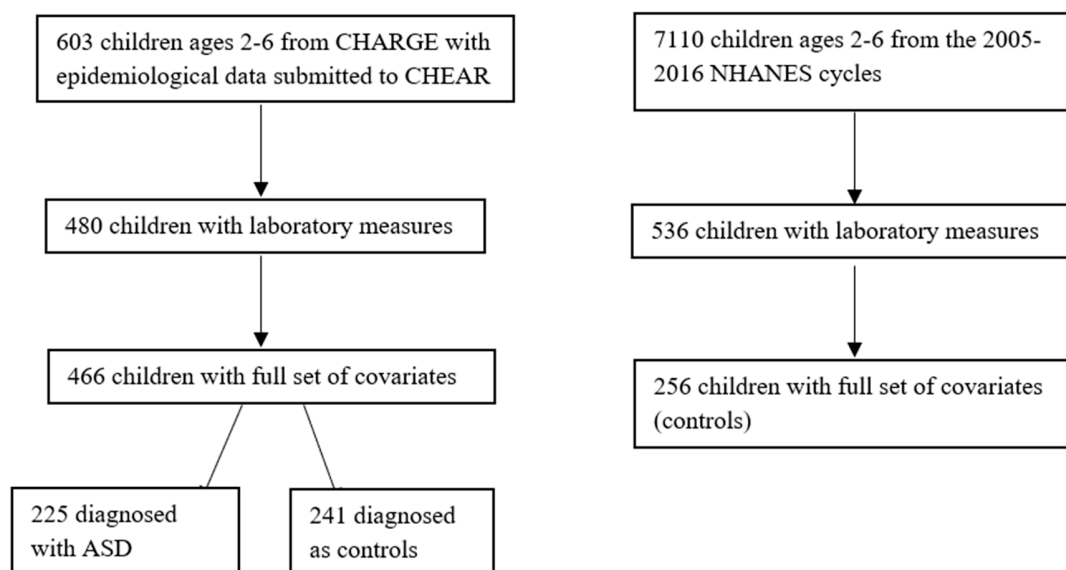

Supplement: s1 [file s1]
